# Supplementary material for: SIRT7-dependent deacetylation of the U3-55k protein controls pre-rRNA processing
Source: PubMed Central journal article supplement (PMC4754350; doi:10.1038/ncomms10734), 2016-02-12
Supplement: ncomms10734-s1.pdf [file ncomms10734-s1.pdf]

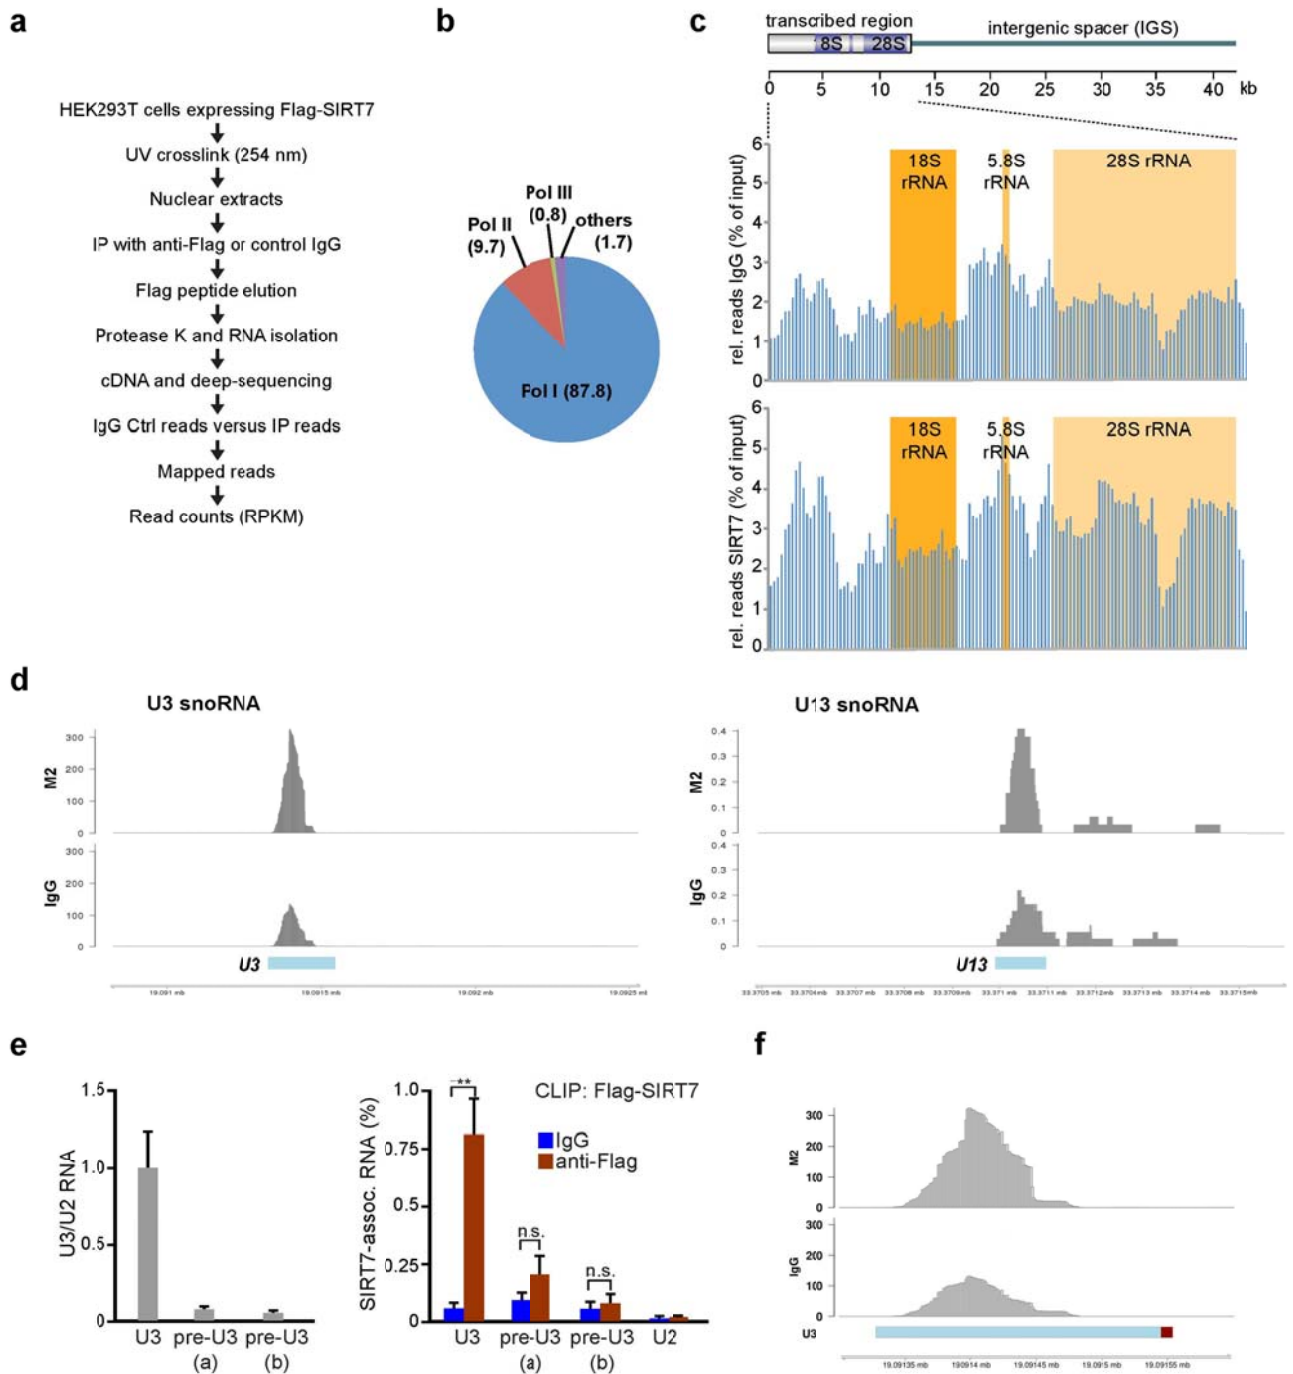

### Supplementary Figure 1. SIRT7 CLIP-seq data analysis.

(a) Experimental pipeline for SIRT7 CLIP-seq. RPKM: Reads Per Kilobase of transcript per Million mapped reads. (b) SIRT7 CLIP-seq reads annotated to Pol I (pre-rRNA), Pol II or Pol III transcribed RNAs of the human genome. The percentage distribution of each to the total reads is indicated. Numbers in brackets indicate the percentage of reads annotated to Pol I, II, or III transcripts, respectively. Others comprise RNAs from pseudogene, lincRNA and 3'-overlapping ncRNA. (c) SIRT7 and IgG CLIP-seq reads mapped to human rDNA. The region encoding 18S, 5.8S and 28S rRNA is highlighted. The SIRT7 (lower panel) or IgG (upper panel) reads were normalized to input reads. The y-axis indicates the percentage to input. (d) Distribution of SIRT7 reads over U3 and U13 snoRNA genes. Browser view of reads from Flag-SIRT7 associated RNAs (IgG, control IgG; M2, anti-Flag-SIRT7) with ENSEMBL transcript annotation tracks shown below the x-axis. The blue line indicates the position of the U3 and U13 RNA gene locus, respectively; values at the y-axis represent normalized read counts (RPKM). (e) SIRT7 is associated with U3 snoRNA but not with pre-U3 snoRNA. Flag-SIRT7 CLIP was

performed in HEK293T cells stably expressing Flag/HA-SIRT7. IgG was used as negative control (right panel). The relative expression levels of U3 snoRNA and pre-U3 RNA (left panel) were detected by RT-qPCR using two different reverse primers (a, b) for detection of pre-U3 snoRNA. The y-axis (left panel) indicates the rel. U3 snoRNA normalized to U2 snRNA. SIRT7 associated U3 and pre-U3 snoRNAs were analyzed by CLIP-RT-qPCR (right panel). Bars represent means  $\pm$ s.d., n=3 (\*\* $P$ < 0.01). (f) Distribution of SIRT7 CLIP-seq reads at the U3 snoRNA gene. Browser view of reads from Flag-SIRT7 associated RNAs (IgG, control IgG; M2, anti-Flag-SIRT7) with ENSEMBL transcript annotation tracks shown below the x-axis. The blue line indicates the position of the U3 snoRNA gene, the red line indicates the 8 nt extension present at pre-U3 snoRNA.

**a**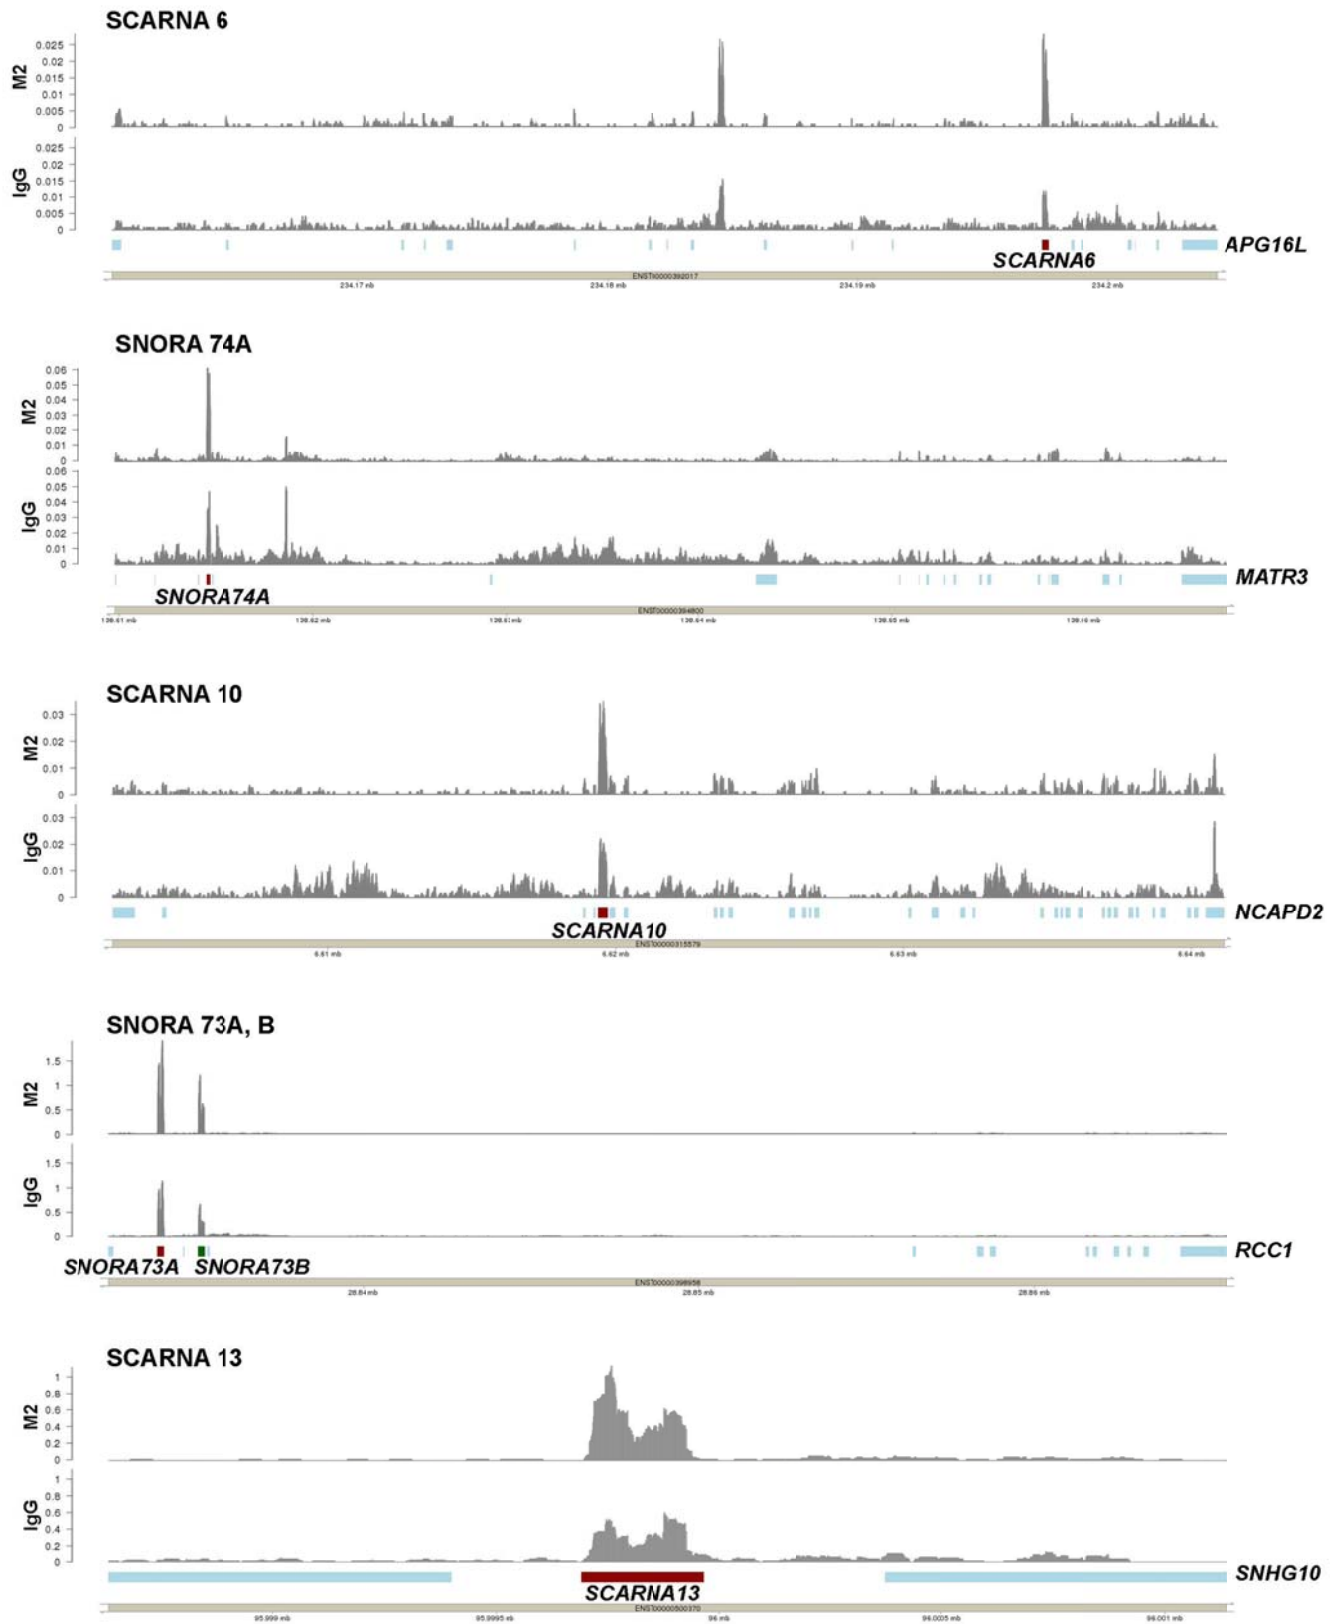

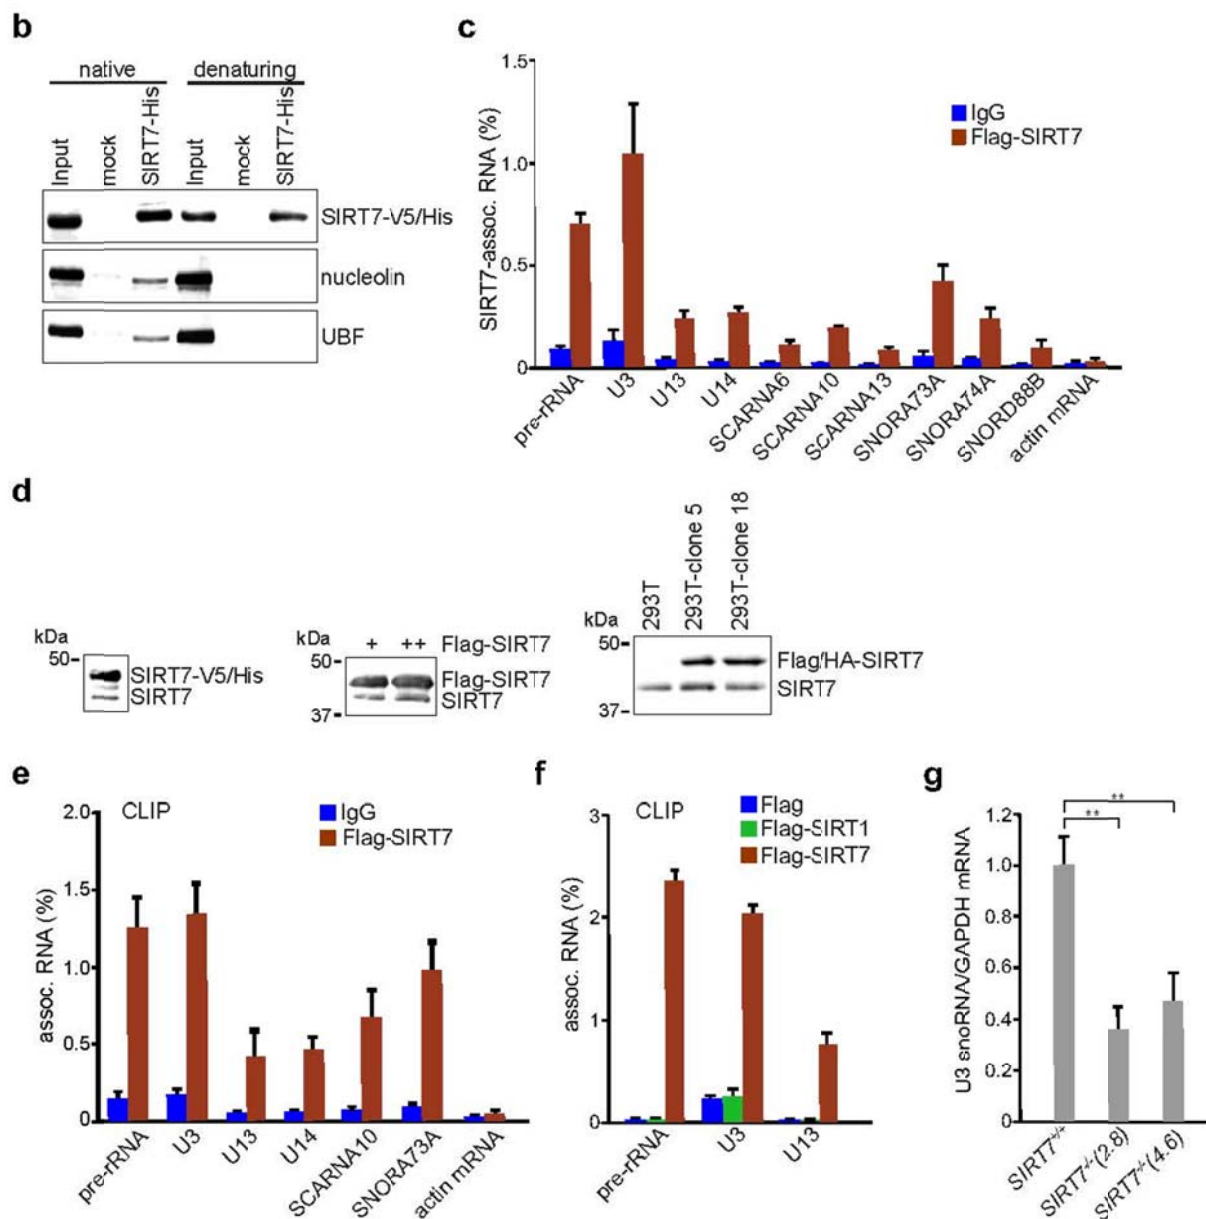

### Supplementary Figure 2. Validation of selected SIRT7 CLIP-seq hits.

(a) Distribution of SIRT7 reads at host genes of selected intron-encoded snoRNAs. Browser view of reads from Flag-SIRT7 associated RNAs (IgG, control IgG; M2, anti Flag-SIRT7) with ENSEMBL transcript annotation tracks shown below the x-axis. The blue lines indicate the position of the exons of the host gene, the red or green lines the position of the snoRNA gene loci. The y-axis represents RPKM. (b) The interaction of SIRT7 with nucleolin and UBF is abolished under denaturing conditions. HEK293T cells expressing V5/His-tagged SIRT7 (SIRT7-V5/His) or untransfected (mock) cells were lysed in non-denaturing or denaturing buffer, and His-tagged SIRT7 was affinity-purified under native or denaturing conditions. Co-purification of nucleolin and UBF was monitored on western blots. See also Fig. 1g. (c) Validation of SIRT7 CLIP-seq data using HEK293T cells stably expressing Flag/HA-tagged SIRT7 (clone 5). SIRT7-associated RNAs were monitored by RT-qPCR using primers specific to the indicated RNAs (see Supplementary Table 3). 5' ETS of pre-rRNA was amplified by primer H1. Data show means  $\pm$  s.d., n=3. (d) Representative western blots showing the expression levels of SIRT7-V5/His (left) and Flag-SIRT7 (middle) transiently expressed in HEK293T cells, and expression levels of FLAG/HA-SIRT7 in two HEK293T cell clones used in this study. All blots were probed with purified anti-SIRT7 antibodies. (e) Validation of SIRT7 CLIP-seq data using HEK293T cells that transiently express Flag-SIRT7. RNAs precipitated by control (IgG) or anti-Flag antibodies (Flag-SIRT7) were quantified by RT-qPCR using primers specific to the indicated RNAs (see Supplementary Table 3). Pre-rRNA was amplified by primer H1. Bars show means  $\pm$  s.d., n=3. (f) Validation of SIRT7 CLIP-seq data using

HEK293T cells that were transfected with empty vector (Flag), and vector expressing Flag-SIRT1, or Flag-SIRT7. Co-precipitated RNAs were quantified by RT-qPCR using primers specific to the indicated RNAs (see **Supplementary Table 3**). Pre-rRNA was amplified by primer H1. Bars show means  $\pm$ s.d., n=3. **(g)** U3 snoRNA is decreased in SIRT7 deficient cells. U3 snoRNA expression was monitored by RT-qPCR in *HEK293T/SIRT7<sup>+/+</sup>* and knockout cell lines *sg2-8* and *sg4-6*. Bars represent means  $\pm$ s.d., n=3 (\*\* $P$ <0.01).

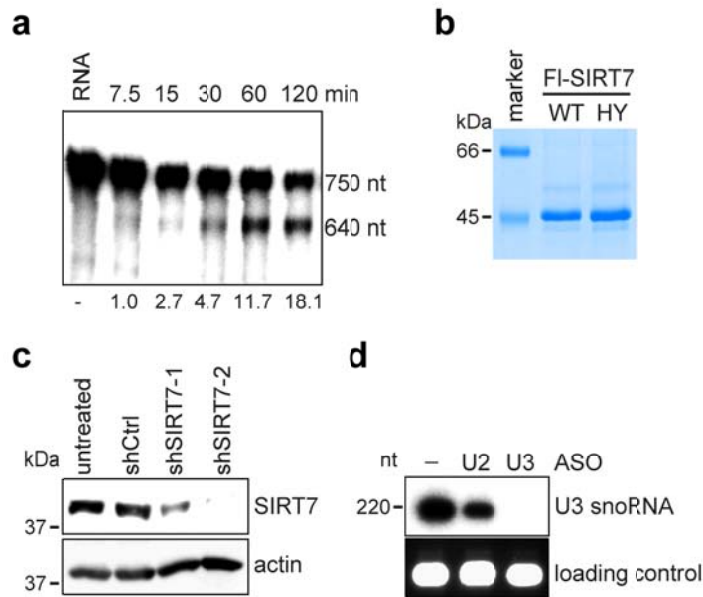

### Supplementary Figure 3. SIRT7 regulates early processing events.

(a) *In vitro* processing assays using extracts from mouse L1210 cells and  $^{32}\text{P}$ -labeled RNA comprising nucleotides from positions +541 to +1290 of mouse pre-rRNA (see **Fig. 2b**). Reactions were terminated after the indicated time and radiolabeled RNA was analysed by gel electrophoresis and PhosphorImaging. Numbers below indicate the ratio of cleaved 640 nt RNA versus uncleaved 750 nt RNA. (b) Coomassie blue-stained SDS/PAA gel of purified wildtype Flag-SIRT7 (WT) and the catalytically inactive point mutant (HY). Broad range protein standards were used as marker. (c) Knockdown of SIRT7 in mouse L1210 cells by SIRT7-specific shRNAs. Western blot of SIRT7 and actin (loading control) in untreated cells and cells expressing a control shRNA (shCtrl), or two SIRT7-specific shRNAs (shSIRT7-1, shSIRT7-2). (d) Depletion of U3-snoRNA by antisense oligonucleotides (ASO). Northern blot showing specific depletion of U3 snoRNA by U3-specific but not by U2 snRNA-specific ASO. An ethidium bromide stain of loaded RNA is shown at the bottom panel.

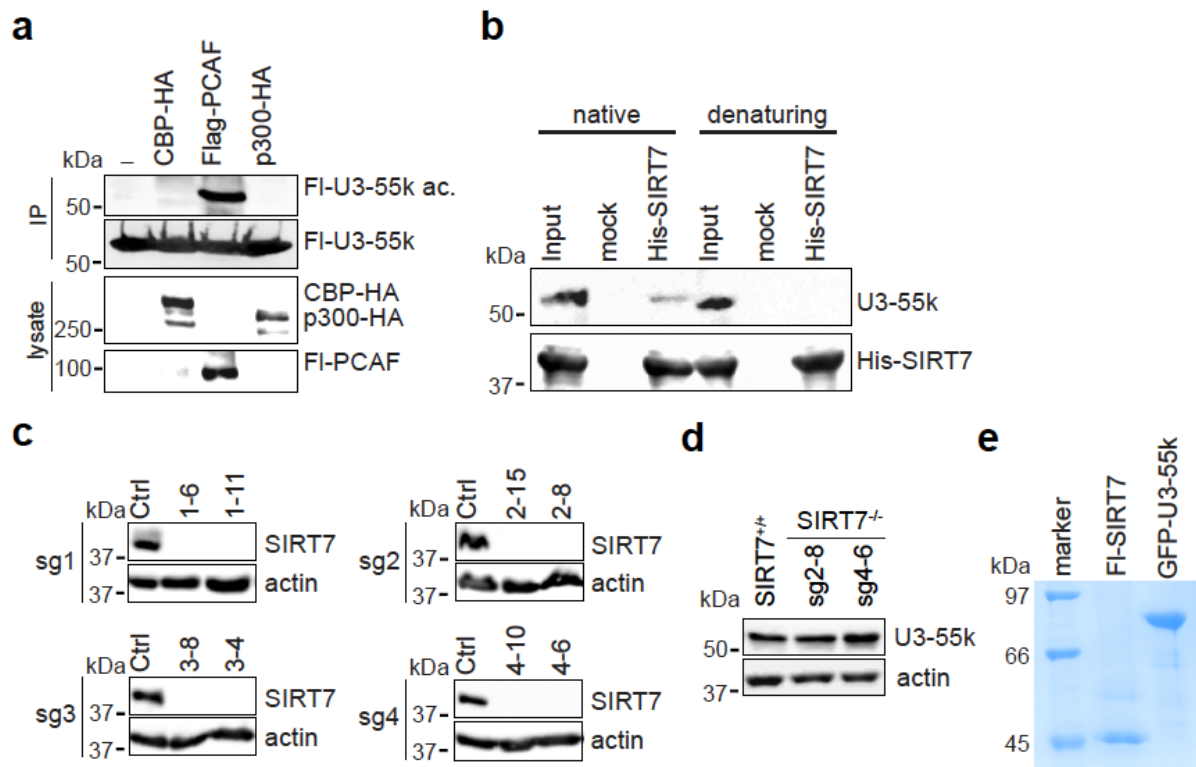

**Supplementary Figure 4. Acetylation and deacetylation of U3-55k is mediated by PCAF and SIRT7 respectively.**

(a) PCAF acetylates U3-55k. Flag-U3-55k was co-expressed with either of the indicated acetyltransferases (CBP-HA, Flag-PCAF, or p300-HA) in HEK293T cells. Western blots show immunoprecipitated Flag-U3-55k, probed with anti-pan-AcK and anti-Flag (IP panels). Expression of CBP-HA, p300-HA, and Flag-PCAF was monitored with anti-HA and anti-Flag antibody (lysate panels). (b) The interaction of SIRT7 with U3-55k is lost under denaturing conditions. SIRT7-V5/His was affinity-purified from untransfected (mock) HEK293T cells or from cells expressing SIRT7-V5/His using native or denaturing conditions. Co-purification of U3-55k was detected on western blots with anti-U3-55k antibody. (c) Western blot showing abrogation of SIRT7 expression in *HEK293T/SIRT7<sup>-/-</sup>* cell clones generated with 4 different SIRT7-gene specific sgRNAs (sg1-sg4). The control lanes contain lysates from parental *HEK293T/SIRT7<sup>+/+</sup>* cells (Ctrl). Equal loading was verified by reprobing the membrane with anti-actin. (d) Expression of U3-55k is not affected by depletion of SIRT7. Western blot showing levels of U3-55k in two different *SIRT7<sup>-/-</sup>* cell clones and in parental HEK293T cells (*SIRT7<sup>+/+</sup>*). (e) Coomassie blue-stained SDS/PAA gel of Flag-SIRT7 and GFP-U3-55k purified from HEK293T cells used for the *in vitro* deacetylation assays shown in Fig. 3g. Broad range protein standards were used as marker.

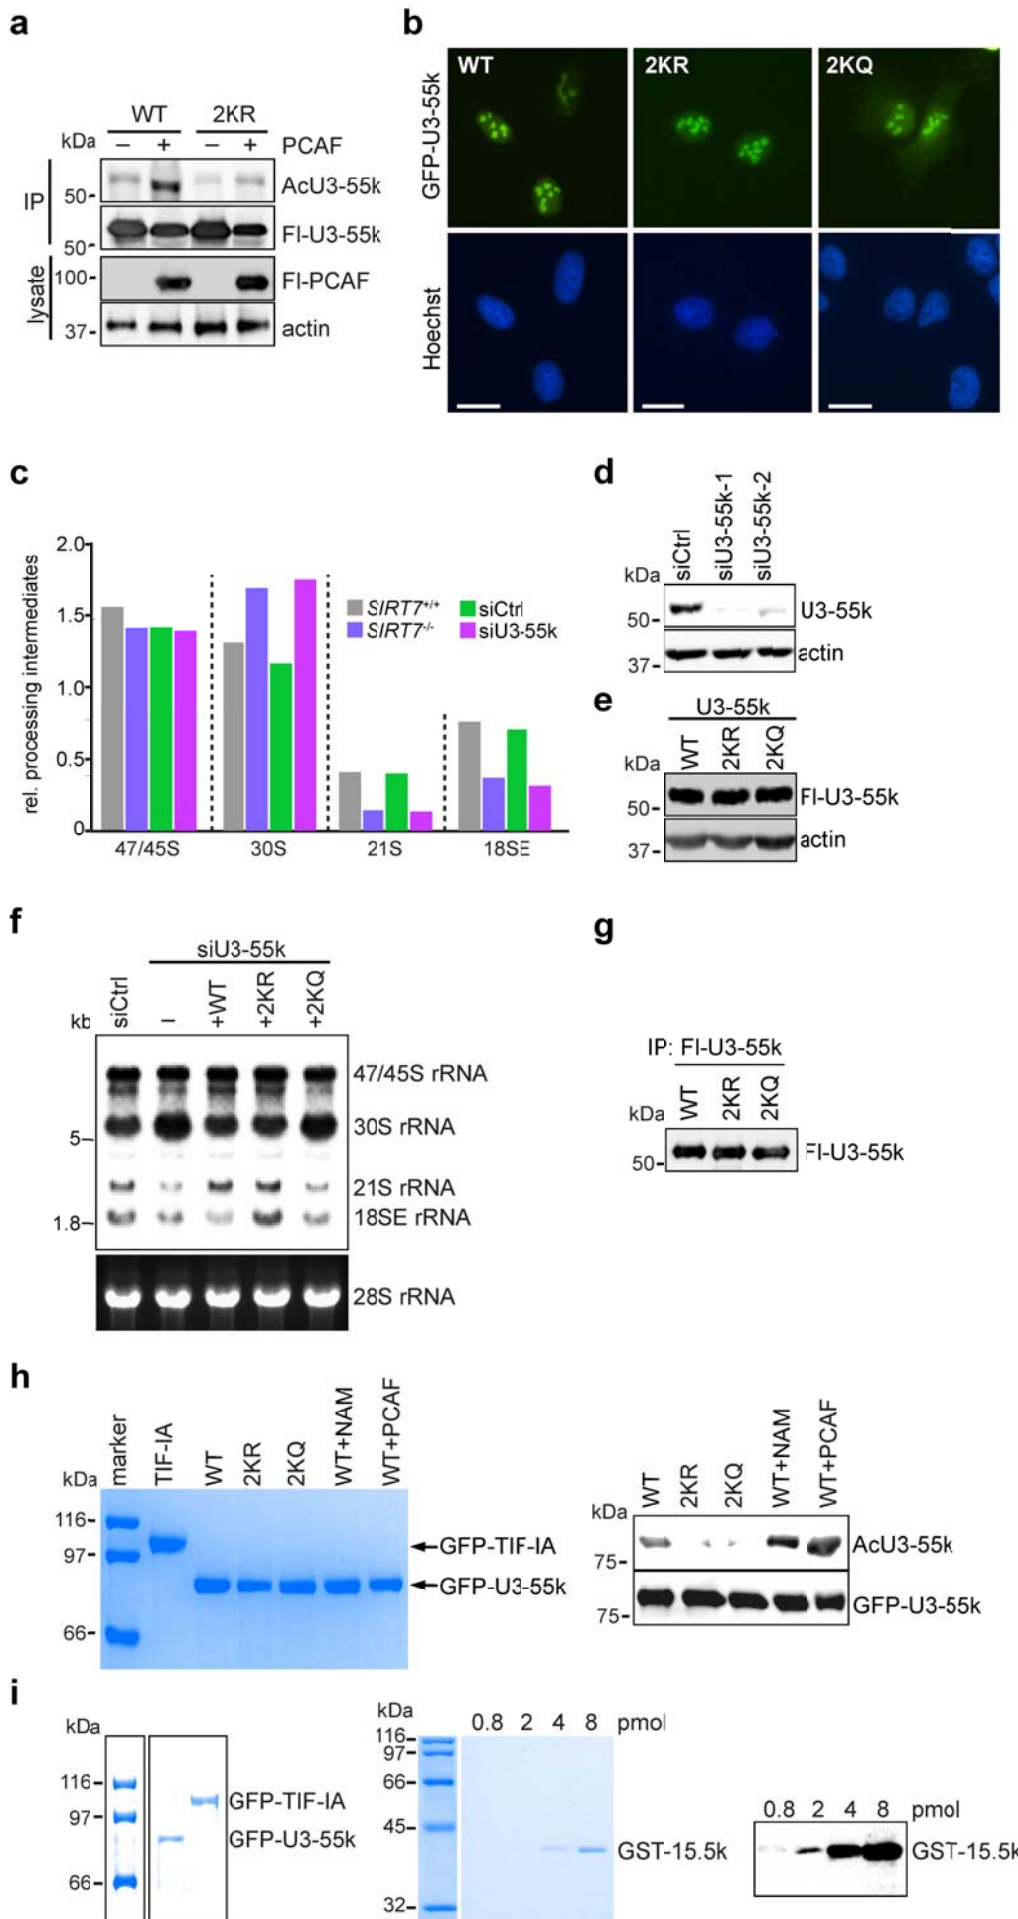



## Supplementary Figure 5. SIRT7-mediated deacetylation of U3-55k promotes U3 snoRNA binding.

(a) PCAF acetylates U3-55k at lysine 12 and 25. Flag-tagged wildtype (WT) or mutant U3-55k (2KR) were expressed in HEK293T cells either alone or together with Flag-PCAF, immunoprecipitated and subjected to western blot analysis with anti-pan-AcK and anti-Flag antibodies (IP panels). Lysates were probed with anti-Flag to detect expression of Flag-PCAF, and reprobed with anti-actin to confirm equal loading (lower panels). (b) Cellular localization of wildtype and mutant U3-55k. U2OS cells transiently expressing GFP-tagged wildtype (WT) or mutant U3-55k (2KR or 2KQ) were imaged for GFP-signal distribution ( $n=120$ ). Nuclei were stained with Hoechst 33342. Scale bars, 10  $\mu\text{m}$ . (c) Quantitation of the northern blot signals presented in **Fig. 4c** by PhosphorImaging. (d) Western blot demonstrating knockdown of endogenous U3-55k by two different siRNAs (see **Supplementary Table 2**). (e) Western blot confirming similar expression levels of wildtype (WT) and mutant (2KR and 2KQ) GFP-U3-55k. Related to **Fig. 4d**. (f) Northern blot of RNA in cells depleted of U3-55k. HEK293T cells depleted of U3-55k by U3-55k siRNAs against the 3'-UTR were transfected with Flag-tagged wildtype U3-55k, U3-55k/2KR or 2KQ mutant. RNA was hybridized to  $^{32}\text{P}$ -labeled ITS1 oligo to monitor processing intermediates. (g) Western blot of immunoprecipitated Flag-tagged wildtype (WT) and mutant (2KR and 2KQ) U3-55k used in the CLIP assays in **Fig. 4e**. (h) Coomassie-stained PAA gel of purified bead-bound GFP-TIF-IA (TIF-IA), wildtype (WT) and mutant (2KR, 2KQ) GFP-tagged U3-55k used in the RNA pull-down assays presented in **Fig. 4f**. As indicated, GFP-U3-55k/WT was purified from cells treated with NAM for 6 h (WT+NAM) or from cells co-expressing Flag-PCAF (WT+PCAF). Broad range protein standards were used as marker. In the right panel, the acetylation level of wildtype GFP-U3-55k or the 2KR and 2KQ mutants was detected in western blots with anti-pan-AcK antibody (top). Equal loading of GFP-tagged U3-55k proteins was confirmed with anti-GFP antibody (bottom). (i) GFP-U3-55k, GFP-TIF-IA, and GST-15.5k was analyzed by coomassie staining (left, middle) and western blotting using anti-GST antibody (right). Related to **Fig. 4h**.

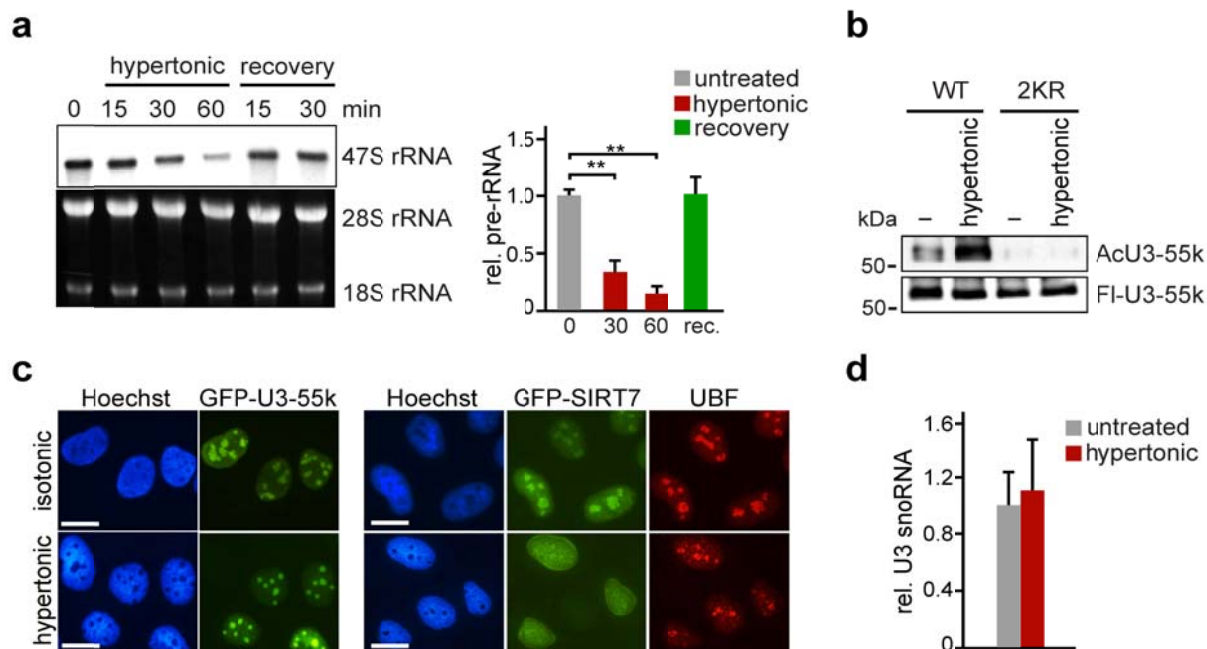

**Supplementary Figure 6. Stress-induced reduction in pre-rRNA synthesis and processing correlates with acetylation of U3-55k.**

(a) Northern blot of pre-rRNA detected by a 5'ETS-specific riboprobe from HEK293T cells that were unperturbed or subjected to hypertonic stress for the indicated time. Restoration of isotonicity for 15 or 30 minutes, after 60 minutes of stress, led to recovery of pre-rRNA levels. The bottom panel shows an ethidium bromide stain confirming equal loading of RNA. Pre-rRNA levels were further confirmed by RT-qPCR normalized to actin mRNA (right panel). Bars represent means  $\pm$ SD from three biological repeats (\*\* $P < 0.01$ ). (b) Lysines 12 and 25 of U3-55k are hyperacetylated upon stress. HEK293T cells expressing wildtype (WT) or mutant (2KR) U3-55k were exposed to hypertonic stress. Acetylation and the amount of immunopurified U3-55k were analyzed on western blots using anti-pan-AcK and anti-Flag antibodies. (c) Cellular localization of U3-55k is not affected by hypertonic stress. Fluorescence images of GFP-U3-55k (left) or GFP-SIRT7 (right) in U2OS cells before and after exposure to hypertonic stress for 1 h. Nuclei were stained with Hoechst 33342. UBF was visualized by immunofluorescence using antibodies specific to UBF (right). Scale bars, 10  $\mu$ m. (d) RT-qPCR analysis of U3 snoRNA level under hypertonic stress. The amount of snoRNA was normalized to actin mRNA. Bars represent means  $\pm$ SD from three biological repeats. See also Fig. 5e.

Uncropped blots related to Fig. 3a

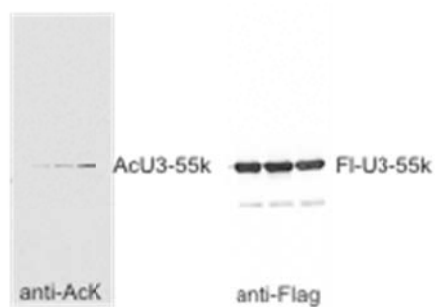

Uncropped blots related to Fig. 3b

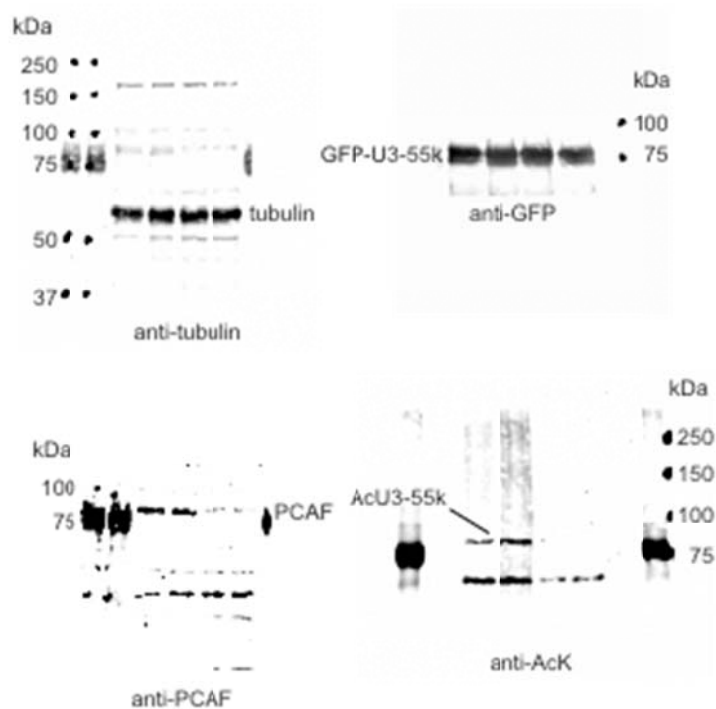

Uncropped blots related to Fig. 3c

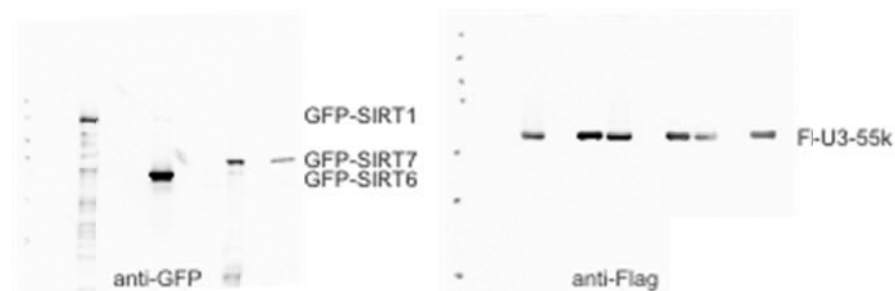

Uncropped blots related to Fig. 3d

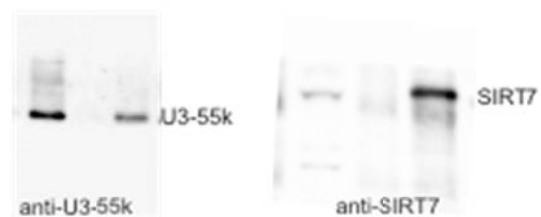

Uncropped blots related to Fig. 3e

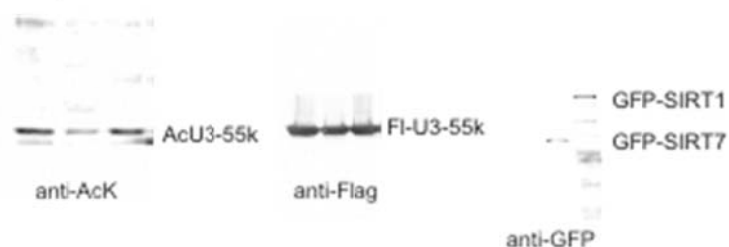

Uncropped blots related to **Fig. 3f** (left panel)

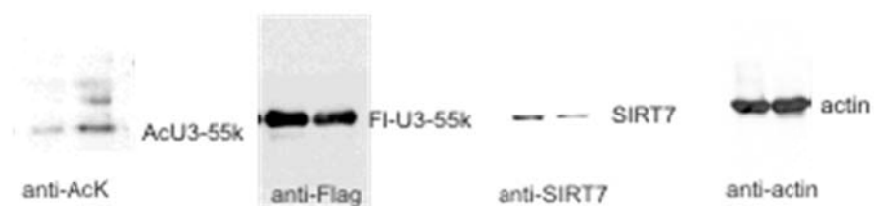

Uncropped blots related to **Fig. 3f** (right panel)

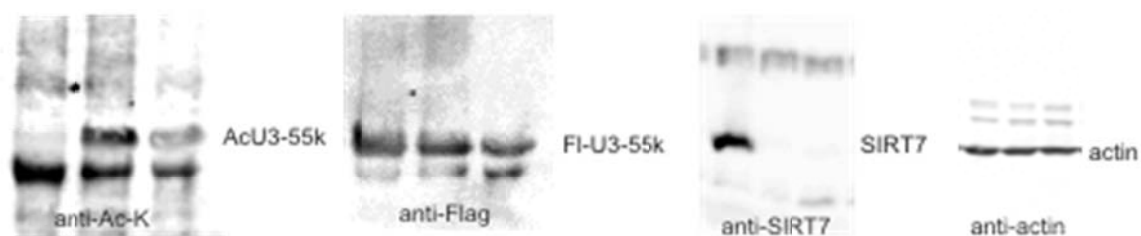

Uncropped blots related to **Fig. 3g**

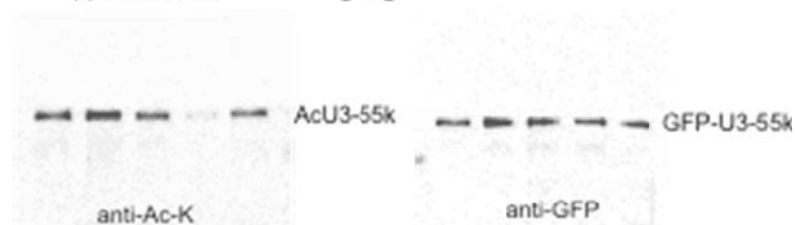

Uncropped blots related to **Fig. 4b**

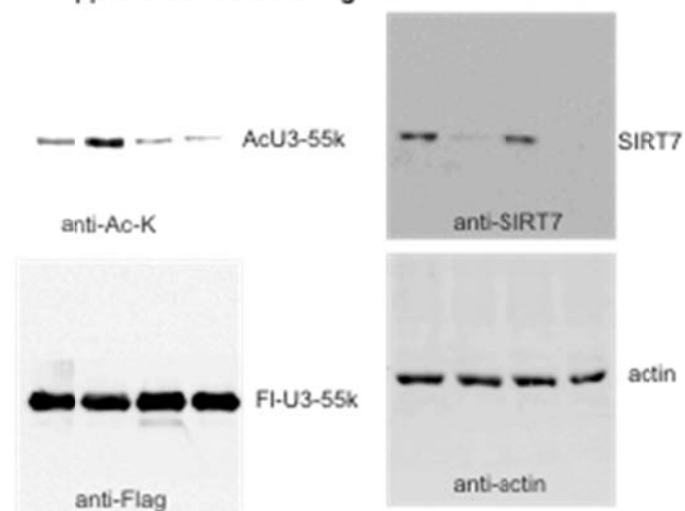

Uncropped gel related to **Fig. 4f**

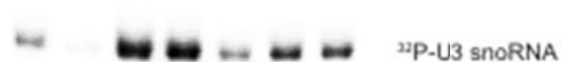

Uncropped gel and blot related to **Fig. 4g**

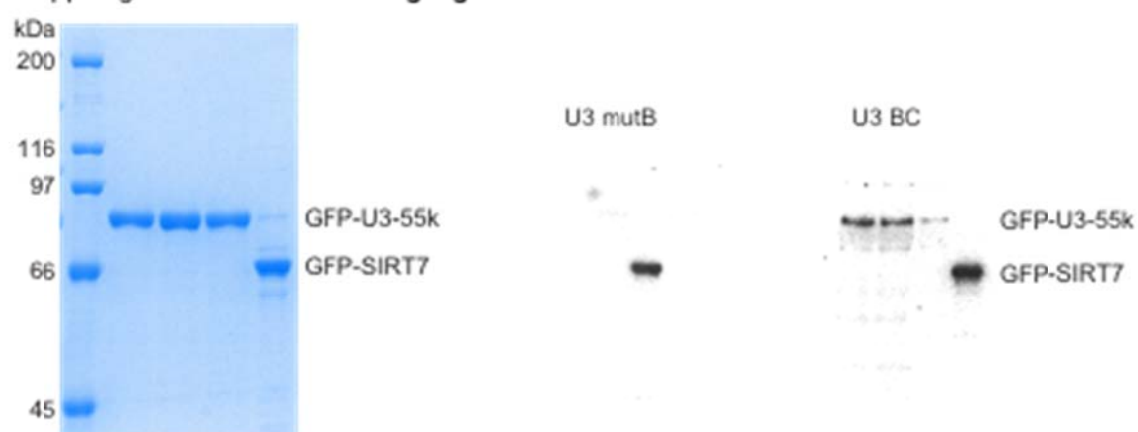

Uncropped gels related to **Fig. 4h**

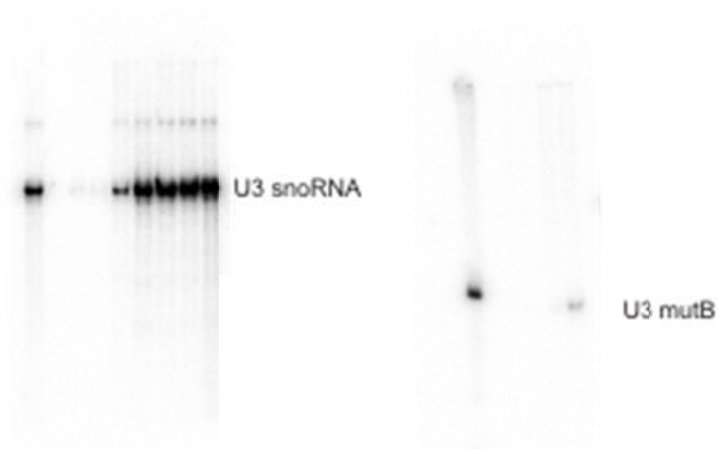

Uncropped blots and gel related to **Fig. 5a**

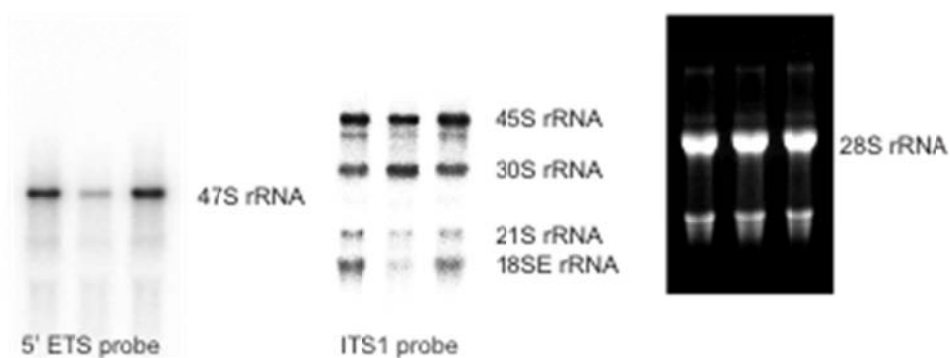

Uncropped blots related to **Fig. 5b**

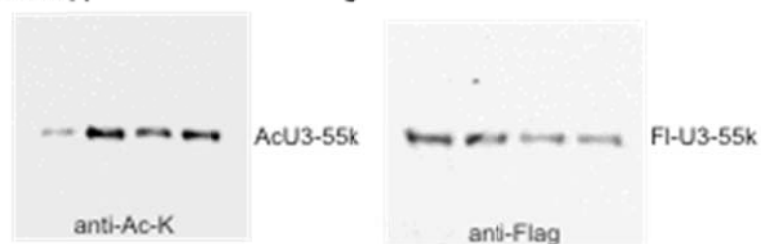

Uncropped blots related to Fig. 5d

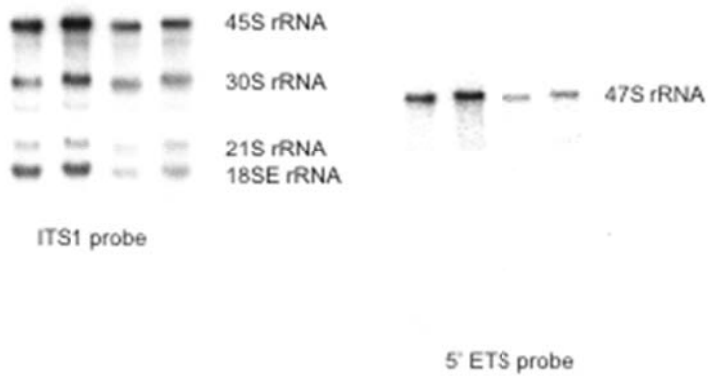

Uncropped blots and gel related to Fig. 5g

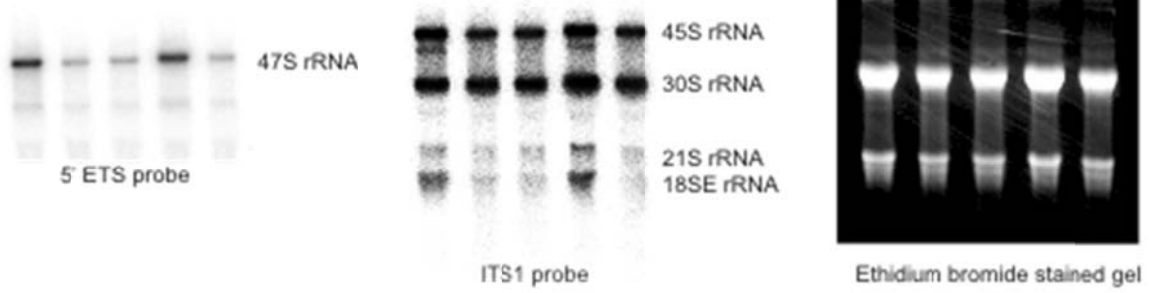

Supplementary Figure 7. Uncropped blots and gels related to Fig. 3, 4 and 5.

**Supplementary Table 1. List of snoRNAs identified in the SIRT7 CLIP reads.**

| Chrom | ChromStart | ChromEnd  | Strand | Exon size (bp) | Name      | Alternative name | Host gene            | snoRNA type                    |
|-------|------------|-----------|--------|----------------|-----------|------------------|----------------------|--------------------------------|
| 12    | 6619387    | 6619717   | +      | 330            | SCARNA10  | U85              | NCAPD2               | sca with C/D and H/ACA domains |
| 14    | 95999691   | 95999966  | -      | 275            | SCARNA13  | U93              | SNHG10               | sca                            |
| 4     | 1976362    | 1976487   | +      | 125            | SCARNA23  | ACA12            | POLA                 | sca H/ACA box                  |
| 2     | 234184372  | 234184648 | +      | 276            | SCARNA5   | U87              | APG16L               | sca with C/D and H/ACA domains |
| 2     | 234197321  | 234197586 | +      | 265            | SCARNA6_1 | U88              | APG16L               | sca with C/D and H/ACA domains |
| 16    | 2012334    | 2012467   | -      | 133            | SNORA10   | ACA10            | RPS2                 | H/ACA                          |
| X     | 51933716   | 51933844  | +      | 128            | SNORA11D  | SNORA11D         | MAGED4               | H/ACA                          |
| 1     | 28907431   | 28907566  | -      | 135            | SNORA16A  | ACA16            | SNHG12               | H/ACA                          |
| 7     | 6056507    | 6056642   | +      | 135            | SNORA42_4 | ACA42            | AIMP2                | H/ACA                          |
| 12    | 98993412   | 98993661  | +      | 249            | SNORA53   | ACA53            | SLC25A3              | H/ACA                          |
| 11    | 2985000    | 2985123   | -      | 123            | SNORA54   | ACA54            | NAP1L4               | H/ACA                          |
| 7     | 45143947   | 45144081  | -      | 134            | SNORA5A   | ACA5             | TBRG4                | H/ACA                          |
| 7     | 45144504   | 45144641  | -      | 137            | SNORA5C   | ACA5c            | TBRG4                | H/ACA                          |
| 1     | 28833877   | 28834083  | +      | 206            | SNORA73A  | U17a             | RCC1                 | H/ACA                          |
| 1     | 28835070   | 28835274  | +      | 204            | SNORA73B  | U17b             | RCC1                 | H/ACA                          |
| 5     | 138614469  | 138614667 | +      | 198            | SNORA74A  | U19              | MATR3                | H/ACA                          |
| 22    | 34100771   | 34100906  | -      | 135            | SNORA76_2 | ACA62            | ESTs cluster         | H/ACA                          |
| 22    | 20113924   | 20114049  | +      | 125            | SNORA77_4 | ACA63            | RANBP1               | H/ACA                          |
| 16    | 2015184    | 2015311   | +      | 127            | SNORA78   | ACA64            | SNHG9                | H/ACA                          |
| 14    | 81669038   | 81669178  | -      | 140            | SNORA79_1 | ACA65            | GTF2A1               | H/ACA                          |
| 21    | 33749495   | 33749631  | -      | 136            | SNORA80   | ACA67            | URB1                 | H/ACA                          |
| 17    | 62223442   | 62223512  | +      | 70             | SNORD104  | U104             | spliced ESTs cluster | C/D                            |
| 20    | 47895476   | 47895565  | +      | 89             | SNORD12C  | U106             | ZFAS1                | C/D                            |
| 8     | 33370992   | 33371096  | +      | 104            | SNORD13   | U13              | -                    | C/D                            |
| 11    | 122930042  | 122930130 | -      | 88             | SNORD14C  | U14C             | HSPA8                | C/D                            |
| 11    | 122929616  | 122929703 | -      | 87             | SNORD14D  | U14D             | HSPA8                | C/D                            |
| 20    | 17943352   | 17943589  | -      | 237            | SNORD17   | HBI-43           | SNX5                 | C/D                            |
| 19    | 48259109   | 48259219  | +      | 110            | SNORD23_1 | HBII-115         | GLTSCR2              | C/D                            |
| 19    | 49993871   | 49993956  | +      | 85             | SNORD33_1 | U33              | RPL13A               | C/D                            |
| 19    | 49994160   | 49994231  | +      | 71             | SNORD34   | U34              | RPL13A               | C/D                            |

|    |           |           |   |     |           |           |              |     |
|----|-----------|-----------|---|-----|-----------|-----------|--------------|-----|
| 19 | 49994431  | 49994517  | + | 86  | SNORD35A  | U35A      | RPL13A       | C/D |
| 9  | 136217701 | 136217767 | + | 66  | SNORD36C  | U36C      | PRL7A        | C/D |
| 1  | 45243514  | 45243584  | + | 70  | SNORD38A  | U38A      | RPS8         | C/D |
| 17 | 19091328  | 19092027  | + | 699 | SNORD3A   | U3        | -            | C/D |
| 17 | 18965224  | 18965807  | + | 583 | SNORD3B-1 | U3        | -            | C/D |
| 12 | 57038810  | 57038885  | - | 75  | SNORD59A  | U59A      | ATP5B        | C/D |
| 16 | 2205023   | 2205106   | - | 83  | SNORD60_2 | U60       | ESTs cluster | C/D |
| 9  | 134361051 | 134361137 | + | 86  | SNORD62A  | U62A      | PRRC2B       | C/D |
| 9  | 134365872 | 134365958 | + | 86  | SNORD62B  | U62B      | PRRC2B       | C/D |
| 2  | 203141153 | 203141241 | + | 88  | SNORD70   | HBII-234  | NOP58        | C/D |
| 14 | 21865450  | 21865560  | - | 110 | SNORD8    | mgU6-53   | CHD8         | C/D |
| 20 | 2636742   | 2636828   | + | 86  | SNORD86   | HBII-202  | NOP56        | C/D |
| 19 | 51302288  | 51302379  | - | 91  | SNORD88B  | HBII-180B | C19orf48     | C/D |



**Supplementary Table 2. Sequences of siRNAs used in this study.**

| Name                      | RNA sequences (5' to 3')                                      |
|---------------------------|---------------------------------------------------------------|
| U3-55k siRNA-1<br>(3'UTR) | sense: CCACCCUCUUUGUAUUAAA<br>antisense: UUUAAUACAAAGAGGGUGG  |
| U3-55k siRNA-2<br>(3'UTR) | sense: UUUAAAGUCCUCCCCAGGCU<br>antisense: AGCCUGGGAAGGACUUAAA |

**Supplementary Table 3. Oligos used in this study.**

| Oligo name                         | Sequence (5' to 3')            | Purpose |
|------------------------------------|--------------------------------|---------|
| $\beta$ -actin mRNA F <sup>1</sup> | CGTCACCAACTGGGACGACA           | qPCR    |
| $\beta$ -actin mRNA R <sup>1</sup> | CTTCTCGCGGTTGGCCTTGG           |         |
| U2 snRNA F <sup>2</sup>            | TTTGGCTAAGATCAAGTGTAGTATCTGTTC | qPCR    |
| U2 snRNA R <sup>2</sup>            | AATCCATTTAATATATTGTCCTCGGATAGA |         |
| U3 snoRNA F <sup>3</sup>           | AGAGGTAGCGTTTTCTCCTGAGCG       | qPCR    |
| U3 snoRNA R <sup>3</sup>           | ACCACTCAGACCGCGTTCTC           |         |
| U13 snoRNA F <sup>4</sup>          | CTTTTGTAGTTCATGAGCGTG          | qPCR    |
| U13 snoRNA R <sup>4</sup>          | GGTCAGACGGGTAATGTGC            |         |
| U14 snoRNA F <sup>5</sup>          | TGGTTTTCCAACATTTCGAG           | qPCR    |
| U14 snoRNA R <sup>5</sup>          | ATCCAAGGAAGGTTTACCCA           |         |
| SCARNA6 F                          | GTCCCTCATTCTGTGTTCCCTC         | qPCR    |
| SCARNA6 R                          | GCAGATCATAGCCACAGATACC         |         |
| SCARNA10 F                         | TCTTGGTGGGCGATACAGAGTTA        | qPCR    |
| SCARNA10 R                         | CTTGGCCCTGATACCCTGAACAT        |         |
| SCARNA13 F                         | CCTCTGATAGTTTCTGGTCACTG        | qPCR    |
| SCARNA13 R                         | AGCTTCTCTTACTGTTGGCG           |         |
| SNORA73A (U17A) F                  | AATAAAGCTGGGCTCGTGTCTG         | qPCR    |
| SNORA73A (U17A) R                  | GCTGTTTCCTGCATGGTTTGTCTC       |         |
| SNORA74A F                         | CACTGTCTTTATTGAGGTTTGGC        | qPCR    |
| SNORA74A R                         | GTCATTCCACTCTCAGAGGTG          |         |
| SNORD88B F                         | GACCCCGTGATGTCCAG              | qPCR    |
| SNORD88B R                         | AGAACCCCGGATGTCAAAG            |         |
| pre-U3 snoRNA R (a)                | AAGGAAAAACCACTCAGA             | qPCR    |
| pre-U3 snoRNA R (b)                | AAGGAAAAACCACTCA               | qPCR    |
| pre-rRNA F <sup>1</sup>            | TGTCAGGCGTTCTCGTCTC            | qPCR    |
| pre-rRNA R <sup>1</sup>            | AGCACGACGTCACCACATC            |         |

|                                  |                                                                |                  |
|----------------------------------|----------------------------------------------------------------|------------------|
| rDNA H1 F <sup>6</sup>           | GGCGGTTTGAGTGAGACGAGA                                          | qPCR             |
| rDNA H1 R <sup>6</sup>           | ACGTGCGCTCACCGAGAGCAG                                          |                  |
| rDNA H4 F <sup>6</sup>           | CGACGACCCATTCGAACGTCT                                          | qPCR             |
| rDNA H4 R <sup>6</sup>           | CTCTCCGGAATCGAACCTGA                                           |                  |
| rDNA H18 F <sup>6</sup>          | GTTGACGTACAGGGTGGACTG                                          | qPCR             |
| rDNA H18 R <sup>6</sup>          | GGAAGTTGTCTTCACGCCTGA                                          |                  |
| rDNA +541/T7 F (mouse)           | TAATACGACTCACTATAGGGAGGTCGCTCGTTGTGTTCTC<br>TTG                | cloning          |
| rDNA +1290 R (mouse)             | AAACTTTCCAACCCAGCCGCG                                          | cloning          |
| rDNA +709/T7 F (mouse)           | TAATACGACTCACTATAGGGAGGGCGAGGGACGGACATT<br>CA                  | cloning          |
| rDNA +1060 R (mouse)             | AGGAGACAAACCTGGAACG                                            | cloning          |
| Flag-U3-55k F                    | CGCGGATCCCATGTTCGGCAACAGCGGCTGCTCGTA                           | cloning          |
| Flag-U3-55k R                    | CACAGGGGCCCTCAGGAACCAGCAGCTGGGGGTACA                           |                  |
| GFP- U3-55k F                    | CACAGGGGCCCATGTTCGGCAACAGCGGCTGCTCGTA                          | cloning          |
| GFP- U3-55k R                    | CGCGGATCCTCAGGAACCAGCAGCTGGGGGTACA                             |                  |
| U3-55k/K12R F                    | GCGGGGACGGCCGGCCTCTGGGGCC                                      | mutagenesis      |
| U3-55k/K12R R                    | AGGCCGGCCGTCCCCGCTTACGAGC                                      |                  |
| U3-55k/K12Q F                    | GCGGGGACAGCCGGCCTCTGGGGCC                                      | mutagenesis      |
| U3-55k/K12Q R                    | AGGCCGGCTGTCCCCGCTTACGAGC                                      |                  |
| U3-55k/K25R F                    | GGGGGCCGGCCGGCGGGCGAAAG                                        | mutagenesis      |
| U3-55k/K25R R                    | CTTTCGCCGCCGCGGGCCGCC                                          |                  |
| U3-55k/K25Q F                    | GGGGGCCGGCCAGCGGGCGAAAG                                        | mutagenesis      |
| U3-55k/K25Q R                    | CTTTCGCCGCCGCTGGCCGGCC                                         |                  |
| sgSIRT7-(1) F <sup>7</sup>       | CACCGTGGTAACGGAGCTGCAGGGC                                      | CRISPR/Cas9      |
| sgSIRT7-(1) R <sup>7</sup>       | AAACGCCCTGCAGCTCCGTTACCA                                       |                  |
| sgSIRT7-(2) F <sup>8</sup>       | CACCGCGAGCGCAAAGCGGCGGAGC                                      | CRISPR/Cas9      |
| sgSIRT7-(2) R <sup>8</sup>       | AAACGCTCCGCCGCTTTGCGCTCG                                       |                  |
| sgSIRT7-(3) F <sup>8</sup>       | CACCGGCGGGTCCGGAGGTTGCGGG                                      | CRISPR/Cas9      |
| sgSIRT7-(3) R <sup>8</sup>       | AAACCCCGCAACCTCCGGACCCGC                                       |                  |
| sgSIRT7-(4) F <sup>8</sup>       | CACCGGCGCATCCTGAGGAAGGCGG                                      | CRISPR/Cas9      |
| sgSIRT7-(4) R <sup>8</sup>       | AAACCCGCCTTCCTCAGGATGCGC                                       |                  |
| mSIRT7 shRNA-1 sense (mouse)     | CCGGAAACTCTACATCGTGAACCTGCTCGAGCAG<br>GTTACAGATGTAGAGTTTTTTTTG | cloning of shRNA |
| mSIRT7 shRNA-1 antisense (mouse) | AATTCAAAAAAACTCTACATCGTGAACCTGCTCGAGCAG<br>GTTACAGATGTAGAGTTT  |                  |
| mSIRT7 shRNA-2 sense (mouse)     | CCGGCCTCCCTCTTTCTACTCCTTACTCGAGTAAGGAGTA<br>GAAAGAGGGAGGTTTTTG | cloning of shRNA |
| mSIRT7 shRNA-2 antisense (mouse) | AATTCAAAAACCTCCCTCTTTCTACTCCTTACTCGAGTAAG<br>GAGTAGAAAGAGGGAGG |                  |

|                                    |                                                                |                  |
|------------------------------------|----------------------------------------------------------------|------------------|
| shRNA scrambled sense (mouse)      | CCGGCAACGAAGGAATTCTTCGGCCCTCGAGGGCCGAAG<br>AATTCCTTCGTTGTTTTTG | cloning of shRNA |
| shRNA scrambled antisense (mouse)  | AATTCAAAAACAACGAAGGAATTCTTCGGCCCTCGAGGGC<br>CGAAGAATTCCTTCGTTG |                  |
| U2 snRNA ASO (mouse) <sup>9</sup>  | CAGATACTACACTTG                                                | depletion        |
| U3 snoRNA ASO (mouse) <sup>9</sup> | GTGGTTTCGGGTGCTC                                               | depletion        |
| ITS1                               | CCTCGCCCTCCGGGCTCCGTTAATGATC                                   | hybridization    |

Unless otherwise indicated all oligos correspond to human sequences.

### Supplementary References

1. Chen, S. *et al.* Repression of RNA polymerase I upon stress is caused by inhibition of RNA-dependent deacetylation of PAF53 by SIRT7. *Mol. Cell* **52**, 303-313 (2013).
2. Zhang, Z. *et al.* SMN deficiency causes tissue-specific perturbations in the repertoire of snRNAs and widespread defects in splicing. *Cell* **133**, 585-600 (2008).
3. Scott, M.S. *et al.* Human box C/D snoRNA processing conservation across multiple cell types. *Nucleic Acids Res.* **40**, 3676-3688 (2012).
4. Nallar, S.C. *et al.* GRIM-1, a novel growth suppressor, inhibits rRNA maturation by suppressing small nucleolar RNAs. *PLoS ONE* **6**, e24082 (2011).
5. Padilla, P.I. *et al.* Association of guanine nucleotide-exchange protein BIG1 in HepG2 cell nuclei with nucleolin, U3 snoRNA, and fibrillarin. *Proc. Natl. Acad. Sci. USA* **105**, 3357-3361 (2008).
6. O'Sullivan, A.C., Sullivan, G.J. & McStay, B. UBF binding in vivo is not restricted to regulatory sequences within the vertebrate ribosomal DNA repeat. *Mol. Cell. Biol.* **22**, 657-668 (2002).
7. Shalem, O. *et al.* Genome-scale CRISPR-Cas9 knockout screening in human cells. *Science* **343**, 84-87 (2014).
8. Wang, T., Wei, J.J., Sabatini, D.M. & Lander, E.S. Genetic screens in human cells using the CRISPR-Cas9 system. *Science* **343**, 80-84 (2014).
9. Kass, S., Tyc, K., Steitz, J.A. & Sollner-Webb, B. The U3 small nucleolar ribonucleoprotein functions in the first step of pre-ribosomal RNA processing. *Cell* **60**, 897-908 (1990).
